# Supplementary material
Source: PubMed Central journal article supplement (PMC6483375)
Supplement: NIHMS947589-supplement.pdf [file NIHMS947589-supplement.pdf]

## Supplementary Table S1 List of the primary antibodies used in the present study

### *In-house produced monoclonal antibodies*

| <i>Target protein</i>      | <i>Immunogen</i>                    | <i>Host</i> | <i>Clone</i> | <i>Subclass</i> | <i>WB dilution<sup>a</sup></i> | <i>IHC concentration<sup>b</sup></i> | <i>Reference</i>               |
|----------------------------|-------------------------------------|-------------|--------------|-----------------|--------------------------------|--------------------------------------|--------------------------------|
| Syntaxin-1                 | Crude human brain immunoprecipitate | Mouse       | SP7          | IgG2a           | 1:100                          | 3 µg/ml                              | Honer <i>et al.</i> , 1993     |
| Syntaxin-1                 | Crude human brain immunoprecipitate | Mouse       | SP6          | IgG1            | 1:100                          | –                                    | Honer <i>et al.</i> , 1993     |
| SNAP25                     | Crude human brain immunoprecipitate | Mouse       | SP12         | IgG1            | 1:100                          | 3 µg/ml                              | Honer <i>et al.</i> , 1993     |
| VAMP                       | Crude human brain immunoprecipitate | Mouse       | SP10         | IgM             | 1:10                           | 6 µg/ml                              | Honer <i>et al.</i> , 1993     |
| VAMP                       | Crude human brain immunoprecipitate | Mouse       | SP11         | IgG1            | 1:10                           | 6 µg/ml                              | Honer <i>et al.</i> , 1993     |
| Complexin-I                | Purified synthetic complexin-I      | Mouse       | SP33         | IgG1            | 1:10                           | 6 µg/ml                              | Takahashi <i>et al.</i> , 1995 |
| Complexin-II               | Purified synthetic complexin-II     | Mouse       | LP27         | IgG1            | 1:10                           | 10 µg/ml                             | Takahashi <i>et al.</i> , 1995 |
| Synaptophysin              | Schizophrenia brain homogenate      | Mouse       | EP10         | IgG1            | 1:100                          | –                                    | Honer <i>et al.</i> , 1989     |
| Synaptotagmin <sup>c</sup> | Rat brain synaptic membranes        | Mouse       | MAB30        | IgG1            | 1:100                          | –                                    | Matthew <i>et al.</i> , 1981   |
| Tau (misfolded)            | Crude homogenate of human AD brain  | Mouse       | Alz-50       | IgM             | –                              | 1 µg/ml                              | Wolozin <i>et al.</i> , 1986   |

### *Commercially available antibodies*

| <i>Target protein</i>                     | <i>Immunogen</i>                      | <i>Host</i> | <i>Clone</i> | <i>Subclass</i> | <i>WB dilution</i> | <i>IHC dilution</i> | <i>Cat. no.</i> | <i>Vendor</i>    |
|-------------------------------------------|---------------------------------------|-------------|--------------|-----------------|--------------------|---------------------|-----------------|------------------|
| SNAP25                                    | Human brain synaptosomal extract      | Mouse       | SMI 81       | IgG1            | 1:2,000            |                     | SMI-81R         | Covance          |
| SNAP25B                                   | Rat SNAP25B, residues 58-72           | Rabbit      | Polyclonal   | –               | 1:1,000            |                     | 111 113         | Synaptic Systems |
| HLA-DP/DQ/DR                              | Human                                 | Mouse       | CR3/43       | IgG1            | –                  | 1:100               | M0775           | Dako             |
| β-amyloid                                 | Synthetic Aβ <sub>17-24</sub> peptide | Mouse       | 4G8          | IgG2b           | –                  | 1:500               | 800709          | BioLegend        |
| pS <sup>202</sup> /pT <sup>205</sup> -Tau | Partially purified human PHF-tau      | Mouse       | AT8          | IgG1            | –                  | 1:1,000             | MN1020          | ThermoFisher     |

*Abbreviations:* AD, Alzheimer's disease; IHC, immunohistochemistry; PHF, paired helical filament; pS, phosphoserine; pT, phosphothreonine; SNAP25, synaptosome-associated protein of 25 kDa; STXBP1, syntaxin-binding protein-1; VAMP, vesicle-associated membrane protein; WB, Western blotting

<sup>a</sup> Dilutions correspond to hybridoma cell culture supernatants, and were equal to the dilutions used in WB assays

<sup>b</sup> Concentrations correspond to affinity column-purified antibodies from hybridoma cell culture supernatant

<sup>c</sup> Hybridomas were obtained from the Developmental Studies Hybridoma Bank developed under the auspices of the NICHD and maintained by The University of Iowa, Department of Biology, Iowa City, IA 52242

## References

- Honer WG, Kaufmann CA, Kleinman JE, Casanova MF, Davies P. Monoclonal antibodies to study the brain in schizophrenia. *Brain Res.* 1989;500:379–83.
- Honer WG, Hu L, Davies P. Human synaptic proteins with a heterogeneous distribution in cerebellum and visual cortex. *Brain Res.* 1993;609:9–20.
- Matthew WD, Tsavaler L, Reichardt LF. Identification of a synaptic vesicle-specific membrane protein with a wide distribution in neuronal and neurosecretory tissue. *J. Cell Biol.* 1981;91:257–69.
- Takahashi S, Yamamoto H, Matsuda Z, Ogawa M, Yagyu K, Taniguchi T, et al. Identification of two highly homologous presynaptic proteins distinctly localized at the dendritic and somatic synapses. *FEBS Lett.* 1995;368:455–60.
- Wolozin BL, Pruchnicki A, Dickson DW, Davies P. A neuronal antigen in the brains of Alzheimer patients. *Science.* 1986;232:648–50.

**Supplementary Table S2** Characteristics of the recombinant proteins used in reconstitution assays

| <i>Protein</i>   | <i>Origin</i> | <i>Sequence</i> | <i>Tag (position)</i> | <i>Theoretical MW</i> | <i>Preparation</i> | <i>Catalogue no.</i> | <i>Vendor</i>     |
|------------------|---------------|-----------------|-----------------------|-----------------------|--------------------|----------------------|-------------------|
| Syntaxin-1A      | Human         | aa 1-265 (full) | Untagged              | 30.7 kDa              | unknown            | NBP2-52366           | Novus Biologicals |
| SNAP25 isoform B | Human         | aa 1-206 (full) | Untagged              | 23.0 kDa              | <i>E. coli</i>     | NBC1-18344           | Novus Biologicals |
| SNAP25 isoform B | Human         | aa 1-206 (full) | Myc-DDK (C-t)         | 23.1 kDa              | HEK293             | TP312596             | OriGene           |
| VAMP2            | Human         | aa 1-89 (full)  | His (N-t)             | 13.8 kDa              | <i>E. coli</i>     | NBP1-18335           | Novus Biologicals |
| M18L             | Human         | aa 1-603 (full) | GST (N-t)             | 95.1 kDa              | Wheat germ         | H00006812-P01        | Abnova            |
| M18S             | Human         | aa 1-594 (full) | GST-His (N-t)         | 95.4 kDa              | Insect cells       | 11751-H20B-100       | Sino Biologicals  |
| Complexin-1      | Human         | aa 1-134 (full) | His (N-t)             | 17.1 kDa              | <i>E. coli</i>     | NBC1-18349           | Novus Biologicals |
| Complexin-2      | Human         | aa 1-134 (full) | His (N-t)             | 16.8 kDa              | <i>E. coli</i>     | 11927H07E50          | ThermoFisher      |
| Synaptotagmin-1  | Human         | aa 1-422 (full) | GST (N-t)             | 72.0 kDa              | Wheat germ         | ab132655             | Abcam             |

*Abbreviations:* C-t, carboxyl-terminus; GST, glutathione-S-transferase; HEK, human embryonic kidney cells; His, poly-histidine tag; M18L, munc18-1 long variant (a.k.a. isoform 1); M18S, munc18-1 short variant (a.k.a. isoform 2); MW, molecular weight; N-t, amino-terminus; SNAP25, synaptosome-associated protein of 25 kDa; VAMP, vesicle-associated membrane protein; WB, Western blotting

**Supplementary Table S3** Effects of IT and MF immunodensities of the identified presynaptic complexes on MAP participants' cognitive function nearest death assessed in independent linear regression models <sup>a</sup>

| Protein complex                 | IT (n = 154) |                      |                        | MF (n = 174) |                      |                        |
|---------------------------------|--------------|----------------------|------------------------|--------------|----------------------|------------------------|
|                                 | Std. $\beta$ | % cont. <sup>b</sup> | FDR<br><i>p</i> -value | Std. $\beta$ | % cont. <sup>b</sup> | FDR<br><i>p</i> -value |
| 30k STX1                        | 0.1676       | 1.61                 | 0.0801                 | 0.1054       | 0.44                 | 0.3023                 |
| 150k STX1                       | 0.3457       | 8.61                 | <0.0001*               | 0.0819       | 0.13                 | 0.3845                 |
| 450k STX1                       | 0.0930       | 0.35                 | 0.3040                 | 0.0697       | 0.01                 | 0.4897                 |
| 70k SNAP25                      | 0.1931       | 2.43                 | 0.0364*                | 0.2377       | 4.74                 | 0.0081*                |
| 150k SNAP25                     | 0.2079       | 3.29                 | 0.0139*                | 0.0937       | 0.32                 | 0.3559                 |
| 450k SNAP25                     | 0.1780       | 2.09                 | 0.0479*                | 0.1552       | 1.83                 | 0.0579                 |
| 50k CPLX1                       | 0.0433       | -0.30                | 0.6625                 | 0.1045       | 0.58                 | 0.2487                 |
| 200k CPLX1                      | 0.1691       | 1.92                 | 0.0545                 | 0.1871       | 2.67                 | 0.0256*                |
| 500k CPLX1                      | 0.0708       | -0.05                | 0.4612                 | 0.2191       | 4.28                 | 0.0071*                |
| 50k CPLX2                       | 0.0198       | -0.44                | 0.9057                 | -0.0044      | -0.47                | 0.9519                 |
| 200k CPLX2                      | 0.1208       | 0.75                 | 0.2414                 | 0.0490       | -0.24                | 0.9071                 |
| 500k CPLX2                      | 0.1152       | 0.63                 | 0.2846                 | -0.0179      | -0.44                | 0.7979                 |
| 50k CPLX1/2 ratio <sup>c</sup>  | 0.0971       | 0.37                 | 0.3394                 | 0.2134       | 3.88                 | 0.0077*                |
| 200k CPLX1/2 ratio <sup>c</sup> | 0.1467       | 1.63                 | 0.0786                 | 0.1988       | 3.26                 | 0.0165*                |
| 500k CPLX1/2 ratio <sup>c</sup> | 0.0335       | -0.38                | 0.7896                 | 0.3127       | 9.56                 | <0.0001*               |

*Abbreviations:* % cont., percent contribution value; CPLX1/2, complexin-I/II; FDR, false discovery rate; S.E., standard error; SNAP25, synaptosome-associated protein of 25 kDa; Std.  $\beta$ , standardized beta estimate; STX1, syntaxin-1

<sup>a</sup> All models were adjusted for age, sex, education, postmortem interval, local (i.e. IT or MF)  $\beta$ -amyloid and phosphotau load, macroinfarcts, Lewy bodies, hippocampal sclerosis, and synaptic density (mean of total syntaxin-1, SNAP25 and VAMP immunodensities). Group sizes, individual standardized  $\beta$ -coefficients, and FDR-adjusted *p*-values are also reported.

<sup>b</sup> Percent contribution values were calculated as the difference between the whole model adjusted  $R^2$  values obtained before and after adding each of the indicated neurochemical measures as terms into the reference model containing all covariates.

<sup>c</sup> Ratios of CPLX1 to CPLX2 for each of the indicated complex sizes.

**Supplementary Table S4** Linear regression models<sup>a</sup> showing the associations between most relevant presynaptic complexes identified in the IT and MF of MAP participants ( $n = 140$ ), as predictors, and the different cognitive domains or cognitive decline as outcomes

| Model terms                   | Episodic memory |                | Semantic memory |                | Working memory |                | Perceptual speed |                | Visuospatial skills |                | Global cognitive decline slope |                |
|-------------------------------|-----------------|----------------|-----------------|----------------|----------------|----------------|------------------|----------------|---------------------|----------------|--------------------------------|----------------|
|                               | Std. $\beta$    | FDR $p$ -value | Std. $\beta$    | FDR $p$ -value | Std. $\beta$   | FDR $p$ -value | Std. $\beta$     | FDR $p$ -value | Std. $\beta$        | FDR $p$ -value | Std. $\beta$                   | FDR $p$ -value |
| Age at death                  | -0.1249         | 0.1176         | -0.0705         | 0.6405         | -0.1517        | 0.1644         | -0.2216          | 0.0479*        | -0.2516             | 0.0088*        | -0.0730                        | 0.4531         |
| Sex                           | 0.1272          | 0.1176         | 0.0082          | 0.9173         | 0.0028         | 0.9724         | -0.0069          | 0.9914         | -0.1851             | 0.0669         | 0.0135                         | 0.8740         |
| Education                     | -0.0713         | 0.4148         | -0.0599         | 0.6747         | -0.1260        | 0.2264         | -0.0946          | 0.4562         | -0.1758             | 0.0709         | -0.0767                        | 0.4531         |
| PMI                           | -0.0115         | 0.8717         | -0.0219         | 0.8600         | -0.0960        | 0.3439         | -0.0159          | 0.9914         | -0.0600             | 0.5104         | -0.1238                        | 0.2754         |
| Macroinfarcts                 | 0.0624          | 0.4182         | 0.0677          | 0.6405         | 0.1226         | 0.2264         | -0.0420          | 0.9030         | -0.0034             | 0.9652         | -0.1093                        | 0.2754         |
| Lewy bodies                   | 0.0959          | 0.2482         | 0.1514          | 0.1870         | 0.1993         | 0.0925         | 0.1110           | 0.4416         | 0.2330              | 0.0176*        | 0.1977                         | 0.0533         |
| Hipp sclerosis                | 0.1536          | 0.1095         | 0.0553          | 0.6747         | -0.1119        | 0.2945         | 0.1055           | 0.4562         | -0.1063             | 0.2931         | -0.1940                        | 0.0699         |
| $\beta$ -amyloid <sup>b</sup> | -0.2304         | 0.0132*        | -0.2468         | 0.0465*        | -0.2010        | 0.0925         | -0.2082          | 0.0843         | -0.1830             | 0.0709         | -0.2801                        | 0.0177*        |
| Phosphotau <sup>b</sup>       | -0.3043         | 0.0012*        | -0.1401         | 0.2592         | 0.0196         | 0.9022         | 0.0010           | 0.9914         | 0.0938              | 0.3429         | 0.3521                         | 0.0034*        |
| Synapse density <sup>c</sup>  | -0.0143         | 0.8717         | -0.0405         | 0.7298         | -0.0323        | 0.8326         | 0.0234           | 0.9914         | -0.0983             | 0.2931         | -0.0185                        | 0.8740         |
| IT 150k STX1                  | 0.1497          | 0.1146         | 0.2324          | 0.0465*        | 0.2472         | 0.0743         | 0.1426           | 0.3519         | 0.2965              | 0.0084*        | 0.2593                         | 0.0181*        |
| MF 500k ratio <sup>d</sup>    | 0.1966          | 0.0208*        | 0.1493          | 0.1870         | 0.1506         | 0.1644         | 0.2257           | 0.0479*        | 0.1530              | 0.0977         | 0.2379                         | 0.0181*        |

*Abbreviations:* CPLX, complexin; FDR, false discovery rate; Hipp, hippocampal; IT, inferior temporal gyrus; MF, middle-frontal gyrus; PMI, postmortem interval; S.E., standard error; STX1, syntaxin-1.

<sup>a</sup> Each model was constructed independently with the above indicated terms. Individual standardized coefficients (Std.  $\beta$ ) and FDR-adjusted  $p$ -values are reported.

<sup>b</sup> Overall brain load.

<sup>c</sup> Synapse density was estimated as the overall brain levels of the three SNARE proteins (syntaxin-1, SNAP-25 and VAMP) averaged.

<sup>d</sup> Ratio between complexin-I (GABAergic) to complexin-II (glutamatergic) 500-kDa complexes.

\* Statistically significant.

**Supplementary Table S5** Linear mixed-effect models for longitudinal data showing the associations between IT 150-kDa STX1 levels and MF 500-kDa CPLX1/2 ratio and global cognitive decline ( $n = 125$ )

| Model terms                    | Model 1 <sup>a</sup> |       |                 | Model 2 <sup>b</sup> |       |                 | Model 3 <sup>c</sup> |       |                 |
|--------------------------------|----------------------|-------|-----------------|----------------------|-------|-----------------|----------------------|-------|-----------------|
|                                | $\beta$              | SD    | <i>p</i> -value | $\beta$              | SD    | <i>p</i> -value | $\beta$              | SD    | <i>p</i> -value |
| Intercept                      | -0.702               | 0.120 | –               | -0.681               | 0.099 | –               | -0.653               | 0.101 | –               |
| Age at death                   | -0.020               | 0.008 | 0.012*          | -0.020               | 0.008 | 0.010*          | -0.018               | 0.008 | 0.020*          |
| Sex                            | -0.171               | 0.122 | 0.161           | –                    | –     | –               | –                    | –     | –               |
| Education                      | 0.025                | 0.018 | 0.165           | –                    | –     | –               | –                    | –     | –               |
| PMI                            | -0.006               | 0.014 | 0.652           | –                    | –     | –               | –                    | –     | –               |
| Macroinfarcts                  | -0.068               | 0.108 | 0.529           | –                    | –     | –               | –                    | –     | –               |
| LBD                            | -0.368               | 0.139 | 0.008*          | -0.381               | 0.131 | 0.004*          | -0.244               | 0.134 | 0.068           |
| Hippocampal sclerosis          | 0.003                | 0.197 | 0.987           | –                    | –     | –               | –                    | –     | –               |
| $\beta$ -amyloid <sup>d</sup>  | -0.106               | 0.047 | 0.024*          | -0.115               | 0.045 | 0.011*          | -0.288               | 0.065 | <0.001*         |
| Phosphotau <sup>d</sup>        | -0.026               | 0.009 | 0.005*          | -0.023               | 0.009 | 0.010*          | -0.020               | 0.009 | 0.026*          |
| Synapse density <sup>e</sup>   | 0.055                | 0.093 | 0.555           | –                    | –     | –               | –                    | –     | –               |
| IT 150k STX1                   | 0.005                | 0.003 | 0.072           | 0.006                | 0.002 | 0.022*          | 0.015                | 0.004 | <0.001*         |
| MF 500k CPLX1/2                | 0.075                | 0.054 | 0.161           | 0.081                | 0.053 | 0.129           | 0.190                | 0.078 | 0.015*          |
| Time                           | -0.106               | 0.015 | <0.001*         | -0.105               | 0.015 | <0.001*         | -0.092               | 0.015 | <0.001*         |
| Post-3yr DOD                   | 0.093                | 0.028 | <0.001*         | 0.093                | 0.028 | <0.001*         | 0.053                | 0.029 | 0.068           |
| LBD $\times$ Post-3yr DOD      | –                    | –     | –               | –                    | –     | –               | 0.296                | 0.059 | <0.001*         |
| $\beta$ -amyloid $\times$ Time | –                    | –     | –               | –                    | –     | –               | -0.033               | 0.009 | <0.001*         |
| IT 150k STX1 $\times$ Time     | –                    | –     | –               | –                    | –     | –               | 0.002                | 0.001 | <0.001*         |
| MF 500k CPLX1/2 $\times$ Time  | –                    | –     | –               | –                    | –     | –               | 0.025                | 0.012 | 0.032*          |
| <b>Random Effects</b>          |                      |       |                 |                      |       |                 |                      |       |                 |
| Subject                        | 0.835 (88.3%)        |       |                 | 0.850 (88.4%)        |       |                 | 0.847 (88.6%)        |       |                 |
| Time                           | 0.014 (1.5%)         |       |                 | 0.014 (1.5%)         |       |                 | 0.012 (1.3%)         |       |                 |
| Post-3yr DOD                   | 0.043 (4.5%)         |       |                 | 0.043 (4.5%)         |       |                 | 0.044 (4.6%)         |       |                 |
| Residual                       | 0.054 (5.7%)         |       |                 | 0.054 (5.6%)         |       |                 | 0.053 (5.5%)         |       |                 |
| <b>Model Fit</b>               |                      |       |                 |                      |       |                 |                      |       |                 |
| Deviance                       | 637.6                |       |                 | 641.7                |       |                 | 582.7                |       |                 |
| AIC                            | 681.6                |       |                 | 673.7                |       |                 | 622.7                |       |                 |
| <i>R</i> -squared              | 0.327                |       |                 | 0.318                |       |                 | 0.427                |       |                 |

*Abbreviations:* AIC, Akaike information criterion; CPLX1/2, complexin I/II ratio; IT, inferior temporal gyrus; LBD, Lewy body disease; MF, middle-frontal gyrus; Post-3yr DOD, 3-year period before date of death; SD, standard deviation; STX1, syntaxin-1.

<sup>a</sup> Additive model with IT 150k STX1 and MF 500k CPLX1/2 ratio, and other covariates.

<sup>b</sup> Inclusion of only significant covariates that improve model fit.

<sup>c</sup> Inclusion of significant interactions with time.

<sup>d</sup> Overall brain load

<sup>e</sup> Estimated as the overall cortical levels of the three SNARE proteins averaged.

\* Statistically significant.

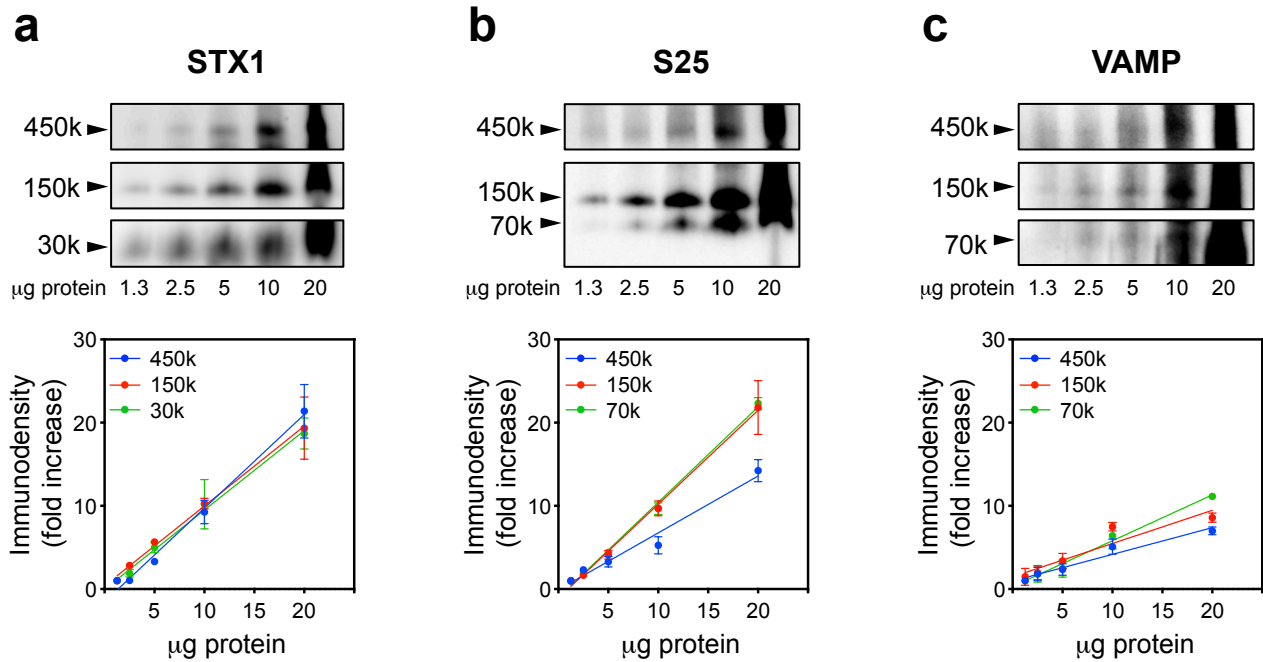

**Supplementary Fig. S1.** Linearity range of the main immunoquantitated complexes. Solubilized brain protein complexes from human inferior temporal cortex (IT) were serially diluted (final total protein contents ranging as indicated), resolved by blue-native (BN)-PAGE and immunoblotted (IB) with specific antibodies against (a) syntaxin-1 (STX1), (b) SNAP25 (S25), and (c) VAMP (SP10) (see Supplementary Table S1). (a–c) Representative immunoblots are shown on top. Points in the scatterplots below are the mean  $\pm$  standard error of 3 independent experiments. Lines represent the best fit for the associations between the loading amounts and the obtained immunodensities. For STX1 and S25, all  $R$ -squared values were above 0.90 ( $P < 0.001$ ). Molecular masses were estimated (in kDa) from native standards loaded aside.

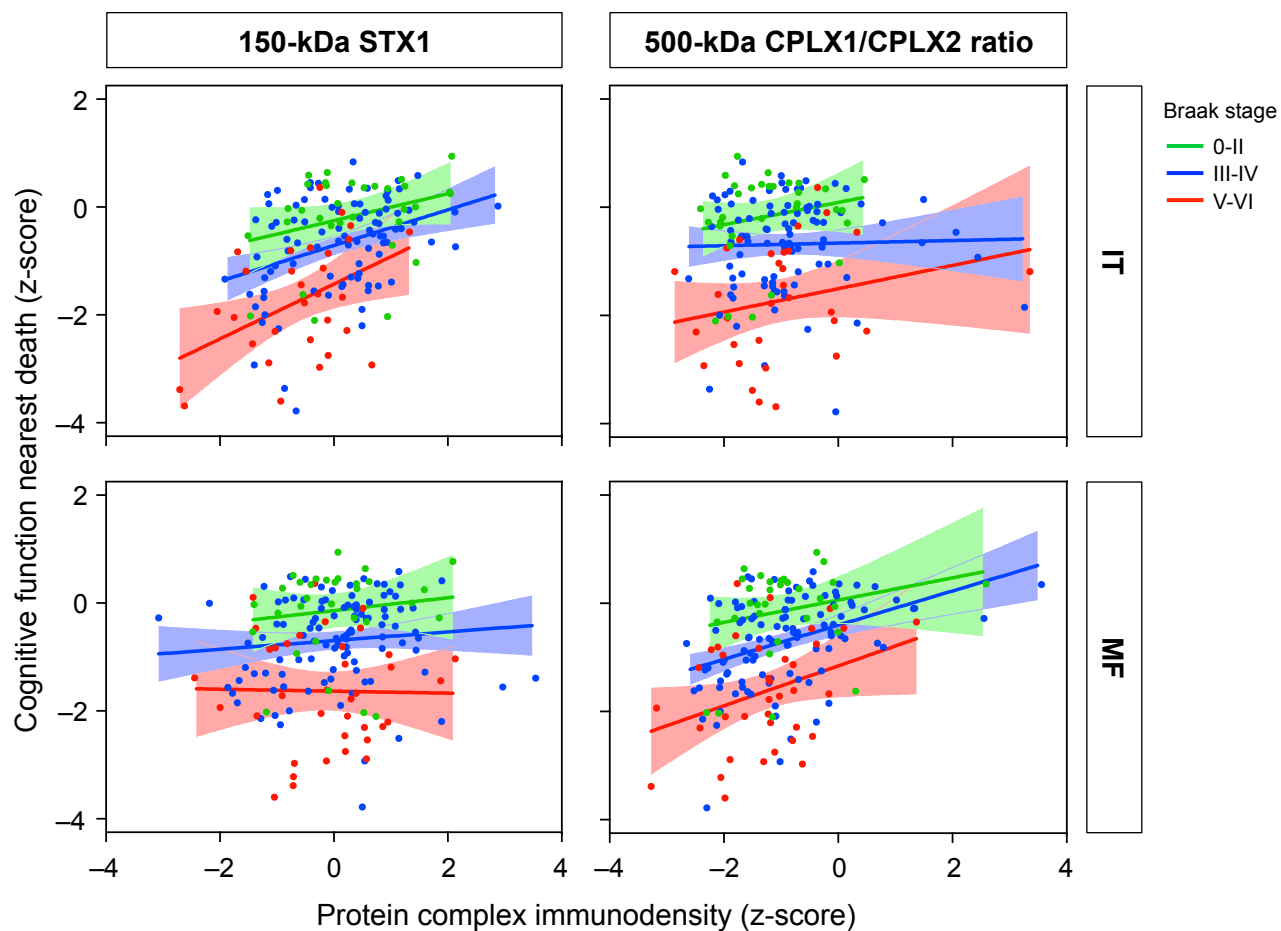

**Supplementary Fig. S2.** Scatterplots representing standardized global cognitive function nearest death against the levels of 150-kDa syntaxin-1 (STX1; left panels) or the ratio of complexin-I (CPLX1) to complexin-II (CPLX2; right panel) in samples from the temporal (upper panels) and frontal (MF; bottom panels) lobes of MAP participants, grouped into Braak 0–II (blue), III–IV (green), or V–VI (red). Best fit (solid lines) and the 95% confidence intervals (shaded areas) calculated for each group are overlaid.
